# Supplementary material
Source: publisher figshare collection journal article supplement (https://plos.figshare.com/articles/dataset/_/688394)
Supplement: Supplementary file [file 1]

**Table S2**

| Object      | Primer | Sequence (5'-3')                          |
|-------------|--------|-------------------------------------------|
| Bbs-<br>vsp | 1F     | GCCTCGCCCTTGGCGCCGCGAGTGGTCGGTGGTAAGCCAGC |
|             | 1R     | CCCGGGATCCTTATTGCATCGCTGGGAG              |
|             | 2F     | TTGGCTTCCACCATGGTCAGCGCCTCGCCCTTGGCGCCGC  |
|             | 2R     | CCCGGGATCCTTATTGCATC                      |
|             | 3F     | AGCCTCGCGCTCCTTCCATTGTTGGCTTCCACCATGGTCAG |
|             | 3R     | CCCGGGATCCTTATTGCATC                      |
|             | 4F     | ATGGCTCCTTTTCTTCAAACCAGCCTCGCGCTCCTTCCAT  |
|             | 4R     | CCCGGGATCCTTATTGCATC                      |

The underlined sequences indicate the regions of annealing parts to the templates. Initial denaturation at 95°C for 3 min, 1 cycle with denaturation at 95°C for 30 sec, annealing at 45°C for 30 sec, polymerization at 74°C for 1 min, 30 cycles with denaturation at 95°C for 30 sec, annealing at 60°C for 30 sec, at polymerization 74°C for 1 min, and final extension at 74°C for 5 min.
