# Supplementary material
Source: publisher figshare collection journal article supplement (https://plos.figshare.com/articles/dataset/_/688394)
Supplement: Supplementary file [file 1]

**Table S1**

|             | MST <sub>50</sub> (days)*<br>(95% confidence level) | LC <sub>50</sub> ( $\times 10^5$ conidia ml <sup>-1</sup> )**<br>(95% confidence level) |
|-------------|-----------------------------------------------------|-----------------------------------------------------------------------------------------|
| Wild type   | 9.3 (6.8 – 11.8)                                    | 41.3 (24.2 – 58.4)                                                                      |
| BbsVSP-#181 | 4.2 (3.4 – 5.0)                                     | 3.6 (2.8 – 4.4)                                                                         |

\*MST<sub>50</sub>: median survival time at  $1 \times 10^7$  conidia ml<sup>-1</sup> of spray treatment.

\*\*LC<sub>50</sub>: lethal concentration causing 50% mortality at 7 days after the spray treatments ( $1 \times 10^5$ ,  $1 \times 10^6$ ,  $1 \times 10^7$ , and  $1 \times 10^8$  conidia ml<sup>-1</sup>).
